# Supplementary material
Source: Research Square preprint supplement (doi:10.21203/rs.3.rs-9891835/v1)
Supplement: Supplementary file 1 [file 4200f6a1ec24eb7ffcd5d25c.pdf]

# Supplementary Information

From public weather narratives to solar-market risk decisions using constrained language-model features

Yuqi Zhou<sup>1</sup>

Xiangrui Meng<sup>2,\*</sup>

Jing Qiu<sup>1</sup>

Junhua Zhao<sup>2</sup>

<sup>1</sup>School of Electrical and Computer Engineering, The University of Sydney, Sydney, NSW 2006, Australia

<sup>2</sup>School of Science and Engineering, The Chinese University of Hong Kong, Shenzhen, Shenzhen 518172, China

\*Correspondence: 222010046@link.cuhk.edu.cn

## Supplementary Note: LLM weather-risk feature extraction

The LLM weather-risk feature cache was generated from National Weather Service Area Forecast Discussion (AFD) text for five forecast offices: AFDLOX, AFDSGX, AFDHNX, AFDSTO, and AFDMTR. For each local issue date and office, the feature builder used the synopsis, short-term, long-term, hazard-potential, and discussion sections when present, applied source-section filtering, and mapped the text into a bounded JSON-style schema.

The schema contains cloud severity, irradiance-reduction risk, storm risk, rain risk, fog or visibility risk, wind risk, heat risk, smoke or dust risk, morning risk, afternoon risk, evening risk, all-day risk, confidence, affected hours, rule-equivalent weather scores, and a short reason. All numeric fields are clipped to  $[0, 1]$ . The derived overall risk score is the maximum of the risk and time-of-day risk fields. The office-date cache was generated with the DeepSeek chat API using model `deepseek-v4-pro`, JSON-object output formatting, temperature 0.0, a 1600-token output limit, one API retry, disabled thinking output, up to three JSON parsing attempts, and deterministic post-processing. Office-level daily records are aggregated by date using maxima for risk fields, mean confidence, and summed product counts. The feature source is recorded as `deepseek_v4_pro_json_output`.

| Quality-control item                           | Value     |
|------------------------------------------------|-----------|
| Forecast offices                               | 5         |
| Unique LLM-feature issue dates                 | 1,462     |
| Shifted feature dates used in the master table | 1,462     |
| Rows after required market/PV fields           | 25,854    |
| 2024–2025 test rows after lag filters          | 17,527    |
| Selected-model training rows                   | 8,303     |
| PV capacity scale (MW)                         | 21,637.75 |
| Numeric risk/confidence completeness           | 100%      |
| Numeric risk/confidence range conformance      | 100%      |

Supplementary Table S1: Experiment labels and abbreviations used in the manuscript.

| Label or abbreviation       | Meaning in this study                                                                                                                                                                        |
|-----------------------------|----------------------------------------------------------------------------------------------------------------------------------------------------------------------------------------------|
| CAISO                       | California Independent System Operator.                                                                                                                                                      |
| SP15 or TH_SP15_GEN-APND    | Southern California trading-hub price proxy used for day-ahead and real-time locational marginal prices.                                                                                     |
| PV                          | CAISO system-level photovoltaic solar generation.                                                                                                                                            |
| DA and RT                   | Day-ahead and real-time market price series.                                                                                                                                                 |
| NWS AFD                     | National Weather Service Area Forecast Discussion text.                                                                                                                                      |
| HRRR                        | High-Resolution Rapid Refresh numerical weather forecast fields.                                                                                                                             |
| NOAA Storm Events           | County-level event labels used for stratified checks and event-day annotation outside the forecast feature sets.                                                                             |
| MLP                         | Scikit-learn multilayer perceptron regressor used for PV forecasting.                                                                                                                        |
| Transformer                 | PyTorch sequence model used for real-time-price forecasting.                                                                                                                                 |
| No-text                     | Forecast model using numerical weather, calendar, public forecast, market, and lag features but no NWS narrative-text features.                                                              |
| Rule-core or rule-text      | Deterministic keyword-risk features mapped from NWS discussion text; the PV rule-core label denotes the cloud/rain-oriented rule feature set used as a matched deterministic text reference. |
| LLM cloud-rule              | PV feature role that keeps the LLM-derived cloud-rule/irradiance-risk signal and excludes broader narrative fields less directly tied to solar irradiance.                                   |
| LLM-rule                    | Price feature role that uses the rule-equivalent weather-risk scores returned by the constrained LLM extraction.                                                                             |
| Scenario path               | Residual-bootstrap PV and RT-price scenarios generated from a specified pair of forecast centers and training residual pools.                                                                |
| MLP no-text anchor          | Deterministic MLP no-text PV forecast used as the common anchor in the main decision comparison.                                                                                             |
| LP-anchor hybrid            | Final quantity $q_{\text{final}} = wq_{\text{LP}} + (1 - w)q_{\text{anchor}}$ , where $q_{\text{LP}}$ is the stochastic LP quantity and $q_{\text{anchor}}$ is the deterministic PV anchor.  |
| Pure LP                     | The unanchored CVaR-regularized stochastic LP at $w = 1$ .                                                                                                                                   |
| Daily scenario CVaR penalty | CVaR term used inside the stochastic LP to regularize daily scenario losses when choosing $q_{\text{LP}}$ .                                                                                  |
| CVaR95 loss                 | Reported ex-post hourly tail-loss metric: the negative average value over the worst 5% of realized hourly settlement-proxy values; lower values are preferred.                               |
| Imbalance proxy             | Sum of absolute differences between the evaluated quantity and realized PV generation, reported in MWh or GWh.                                                                               |
| Residual-bootstrap seed     | Random seed controlling sampled training-residual rows used to generate PV and RT-price scenario paths.                                                                                      |

## Supplementary Note: forecast-seed results

The main text reports compact neural forecast comparisons. Supplementary Tables S2 and S3 report the corresponding five-seed summaries. Positive deltas in Supplementary Table S3 indicate lower error for the LLM-feature model.

Supplementary Table S2: Reported 2024–2025 forecast metrics across five initialization seeds. PV errors are MW and RT-price errors are USD/MWh.

| Target   | Model       | Feature role             | RMSE mean | RMSE SD | MAE mean | MAE SD |
|----------|-------------|--------------------------|-----------|---------|----------|--------|
| PV       | MLP         | No text                  | 1186.03   | 12.58   | 633.22   | 11.73  |
| PV       | MLP         | Rule-core text features  | 1221.09   | 13.48   | 668.62   | 13.32  |
| PV       | MLP         | LLM cloud-rule feature   | 1167.35   | 5.17    | 614.89   | 4.09   |
| RT price | Transformer | No text                  | 18.27     | 0.49    | 10.90    | 0.47   |
| RT price | Transformer | Rule-text weather scores | 18.47     | 0.11    | 11.14    | 0.22   |
| RT price | Transformer | LLM-rule weather scores  | 17.94     | 0.36    | 10.63    | 0.46   |

Supplementary Table S3: Paired five-seed forecast deltas for the main reported comparisons. Positive mean deltas indicate lower LLM-feature error than the reference.

| Comparison                     | Metric | Mean delta | Mean improvement (%) | Paired $p$ |
|--------------------------------|--------|------------|----------------------|------------|
| PV LLM cloud-rule vs no-text   | RMSE   | 18.69      | 1.57                 | 0.0172     |
| PV LLM cloud-rule vs no-text   | MAE    | 18.33      | 2.88                 | 0.0088     |
| PV LLM cloud-rule vs rule-core | RMSE   | 53.74      | 4.39                 | 0.00065    |
| PV LLM cloud-rule vs rule-core | MAE    | 53.73      | 8.01                 | 0.00036    |
| RT LLM-rule vs no-text         | RMSE   | 0.33       | 1.79                 | 0.0518     |
| RT LLM-rule vs no-text         | MAE    | 0.27       | 2.42                 | 0.0398     |
| RT LLM-rule vs rule-text       | RMSE   | 0.53       | 2.87                 | 0.0499     |

### Supplementary Note: forecast slice checks

The slice checks compare the LLM-feature model with its matched neural reference in the forecast instance used for downstream evaluation. Positive improvements indicate lower LLM-feature error.

Supplementary Table S4: Forecast slice metrics for the single cloud-rule downstream forecast instance used in the decision experiment. These values are not the five-seed means in the main forecast table. PV compares MLP LLM cloud-rule with MLP rule-core; RT price compares Transformer LLM-rule with Transformer rule-text.

| Slice                     | Target   | Hours  | Reference RMSE | LLM RMSE | RMSE improvement |
|---------------------------|----------|--------|----------------|----------|------------------|
| All test hours            | PV       | 17,527 | 1236.60        | 1163.28  | +5.93%           |
| All test hours            | RT price | 17,527 | 18.54          | 18.09    | +2.41%           |
| Solar hours               | PV       | 10,229 | 1616.54        | 1521.58  | +5.87%           |
| Solar hours               | RT price | 10,229 | 21.57          | 21.06    | +2.41%           |
| Extreme-event hours       | PV       | 2,904  | 1338.72        | 1318.91  | +1.48%           |
| Extreme-event hours       | RT price | 2,904  | 25.53          | 25.13    | +1.56%           |
| Extreme solar hours       | PV       | 1,694  | 1750.81        | 1726.29  | +1.40%           |
| Extreme solar hours       | RT price | 1,694  | 31.29          | 30.96    | +1.04%           |
| High LLM cloud-risk hours | PV       | 4,598  | 1301.25        | 1298.68  | +0.20%           |
| High LLM cloud-risk hours | RT price | 4,598  | 21.13          | 20.73    | +1.90%           |
| High DA-RT spread hours   | PV       | 4,382  | 1392.28        | 1385.03  | +0.52%           |
| High DA-RT spread hours   | RT price | 4,382  | 30.96          | 30.56    | +1.30%           |

### Supplementary Note: common-anchor settlement-proxy results

The downstream results use a prespecified validation selection over six LP-anchor weights: 0, 0.10, 0.25, 0.50, 0.75, and 1.00. The resulting strategies are frozen for the 2024–2025 test period. The main comparison fixes the deterministic MLP no-text PV anchor for both scenario paths so that no-text and LLM cloud-rule scenarios are compared under the same anchor convention. Stochastic downstream values use 10 matched residual-bootstrap seeds. The validation score in Supplementary Table S5 treats settlement-proxy value, hourly tail-loss exposure, and physical imbalance as co-equal validation dimensions. It averages six min–max-normalized components over the candidate weights: higher mean and minimum settlement-proxy value, lower mean and maximum ex-post hourly CVaR95 loss, and lower mean and maximum physical imbalance. This criterion selects an intermediate LP-anchor blend: larger LP weights increase mean validation value, but the associated increases in physical imbalance and upper-tail loss reduce the composite score. The score is computed on the LLM cloud-rule scenario path under the common MLP no-text anchor, and the selected  $w = 0.25$  is then applied to both the LLM cloud-rule and no-text scenario paths in the matched test-period comparison.

Supplementary Table S5: Validation weight selection for the common no-text-anchor LLM cloud-rule path on the 1 October–31 December 2023 validation split. Higher validation score is preferred.

| $w$  | Mean value (M USD) | Min value (M USD) | Mean CVaR95 loss (k USD/h) | Max CVaR95 loss (k USD/h) | Mean imbalance (GWh) | Max imbalance (GWh) | Score | Rank |
|------|--------------------|-------------------|----------------------------|---------------------------|----------------------|---------------------|-------|------|
| 0.00 | 143.61             | 143.61            | 156.24                     | 156.24                    | 1704.5               | 1704.5              | 0.558 | 5    |
| 0.10 | 146.26             | 146.11            | 155.42                     | 155.76                    | 1714.3               | 1720.2              | 0.654 | 3    |
| 0.25 | 149.39             | 149.01            | 154.43                     | 155.65                    | 1746.2               | 1761.2              | 0.739 | 1    |
| 0.50 | 153.71             | 153.02            | 154.56                     | 157.75                    | 1817.0               | 1847.1              | 0.705 | 2    |
| 0.75 | 157.15             | 156.09            | 155.46                     | 160.70                    | 1905.5               | 1951.2              | 0.578 | 4    |
| 1.00 | 159.87             | 158.32            | 157.51                     | 164.88                    | 2008.5               | 2071.9              | 0.333 | 6    |

At  $w = 0.25$ , the validation score reaches 0.739, the highest value among the candidate weights. The next-highest candidate,  $w = 0.50$ , has a higher mean validation value but also larger maximum CVaR95 loss and physical imbalance, giving a lower composite score of 0.705. The selected weight therefore represents the validation-balanced point used for the aggregate test-period comparison and the event-day example.

Supplementary Table S6: Common-anchor SP15 settlement-proxy metrics. The anchor-only row is deterministic; stochastic hybrid and pure-LP rows report means across 10 residual-bootstrap seeds. CVaR95 loss is the ex-post hourly tail-loss metric defined in Methods. Pure LP denotes the unanchored CVaR-regularized stochastic LP at  $w = 1$ .

| Strategy                         | PV scenario        | RT scenario          | Anchor      | $w$  | Value (M USD) | CVaR95 loss (k USD/h) | Imbalance (GWh) |
|----------------------------------|--------------------|----------------------|-------------|------|---------------|-----------------------|-----------------|
| MLP no-text deterministic anchor | –                  | –                    | MLP no-text | 0.00 | 865.77        | 447.85                | 11251.0         |
| No-text LP-anchor hybrid         | MLP no-text        | Transformer no-text  | MLP no-text | 0.25 | 869.12        | 459.94                | 11844.6         |
| LLM cloud-rule LP-anchor hybrid  | MLP LLM cloud-rule | Transformer LLM-rule | MLP no-text | 0.25 | 881.41        | 453.43                | 11596.4         |
| Pure no-text LP                  | MLP no-text        | Transformer no-text  | none        | 1.00 | 854.97        | 525.72                | 14110.3         |
| Pure LLM cloud-rule LP           | MLP LLM cloud-rule | Transformer LLM-rule | none        | 1.00 | 888.16        | 503.50                | 13436.3         |

Supplementary Table S7: Paired residual-bootstrap seed stability for the selected LLM cloud-rule LP-anchor hybrid relative to the no-text LP-anchor hybrid under the common deterministic MLP no-text PV anchor. Positive CVaR95 and imbalance rows indicate lower loss or lower imbalance for the LLM cloud-rule hybrid.

| Reference             | Metric                          | Mean  | 95% low | 95% high | Paired $p$             |
|-----------------------|---------------------------------|-------|---------|----------|------------------------|
| Common no-text anchor | Value gain (M USD)              | 12.28 | 11.57   | 12.99    | $2.29 \times 10^{-11}$ |
| Common no-text anchor | CVaR95 loss reduction (k USD/h) | 6.51  | 6.21    | 6.81     | $3.38 \times 10^{-12}$ |
| Common no-text anchor | Imbalance reduction (GWh)       | 248.2 | 234.5   | 261.9    | $1.55 \times 10^{-11}$ |

## Supplementary Note: event-day mechanism example

The extreme-weather example in the main text traces the full forecast-to-decision pathway on an NOAA-labelled event day under the same common MLP no-text-anchor convention used in the aggregate decision comparison. Table S8 reports the Figure 4 event-day quantities for the selected  $w = 0.25$  LLM cloud-rule LP-anchor hybrid relative to the deterministic MLP no-text anchor.

## Supplementary Note: reproducibility summary

The pipeline writes a data audit, 2024–2025 test predictions, training residuals, forecast metrics, proxy-evaluation metrics, validation-selected hybrid summaries, paired seed summaries, forecast-slice tables, event-day example tables, and figure inputs. The release package stores paper-ready tables, figure inputs, run records, and the scripts used to regenerate the enrichment tables, figures, and table aggregations.

Supplementary Table S8: NOAA-labelled event-day mechanism example for the selected common-anchor LLM cloud-rule hybrid.

| Date       | Event labels | Reference          | Value delta<br>(k USD) | Imbalance reduction<br>(MWh) | PV RMSE improvement<br>(%) |
|------------|--------------|--------------------|------------------------|------------------------------|----------------------------|
| 2025-03-07 | Heavy Rain   | MLP no-text anchor | 87.8                   | 1948                         | 10.3                       |
